# Supplementary material for: Assessment of an Educational Intervention to Improve Healthy Life Habits in Children Living in Vulnerable Socioeconomic Conditions
Source: MDPI journal article supplement (doi:10.3390/ijerph18094495), 2021-04-23
Supplement: s1 [file s1]

**TABLE S1- DESCRIPTIVE QUESTIONNAIRE FOR PARENTS**

| SOCIODEMOGRAPHIC AND HEALTH INFORMATION                                  |                                                |
|--------------------------------------------------------------------------|------------------------------------------------|
| 1. What is your date of birth?                                           |                                                |
| 2. Gender                                                                | a) Male                                        |
|                                                                          | b) Female                                      |
| 3. How old were you when you had your first child?                       |                                                |
| 4. How many children do you have?                                        |                                                |
| 5. The child who goes to school has some disease such as:                | a) Respiratory disease (asthma, bronchitis...) |
|                                                                          | b) Gastrointestinal diseases:                  |
|                                                                          | c) Epilepsy                                    |
|                                                                          | d) Disability (Down's Syndrome)                |
|                                                                          | e) Mental Disability                           |
|                                                                          | f) Learning or language delay                  |
|                                                                          | g) Behavioral problems                         |
|                                                                          | h) Others                                      |
| 6. Is your child currently in therapy or any kind of treatment?          | a) Yes                                         |
|                                                                          | b) No                                          |
| 7. What treatment or therapy does your child have?                       |                                                |
| 8. How many times has your child gone to the doctor in the last year?    | a) None                                        |
|                                                                          | b) Once                                        |
|                                                                          | c) 2 or 3 times                                |
|                                                                          | d) 4 or 5 times                                |
|                                                                          | e) 6 or 7 times                                |
|                                                                          | f) 8 or 9 times                                |
|                                                                          | g) 10 or more times                            |
| 9. Why did he/she go to the doctor?                                      |                                                |
| 10. Do any of your other children have a disease? Specify which disease: |                                                |

**TABLE S2 - CDC AND GSHS ADAPTED DEMOGRAPHIC QUESTIONNAIRE FOR CHILDREN**

| SOCIODEMOGRAPHIC INFORMATION                                |                                           |
|-------------------------------------------------------------|-------------------------------------------|
| 1. Year of birth                                            |                                           |
| 2. Gender                                                   | a) Boy                                    |
|                                                             | b) Girl                                   |
| 3. What grade are you in?                                   |                                           |
| 4. How many people live at your home?<br>Not including you  |                                           |
| 5. Do you have running water and electricity in your home?  | a) I have neither water nor electricity   |
|                                                             | b) I only have water                      |
|                                                             | c) I only have electricity                |
|                                                             | d) I have water and electricity           |
| 6. What do your parents do for work?                        | - Mother:                                 |
|                                                             | - Father:                                 |
| 7. How many times have you missed school in the last month? |                                           |
| 8. Why did you not go to school?                            | a) I was sick                             |
|                                                             | b) I was grounded without going to school |
|                                                             | c) I was taking care of my brothers       |
|                                                             | d) Others:                                |
| 9. Do you have any diseases?                                | a) Asthma                                 |
|                                                             | b) Diabetes                               |
|                                                             | c) Convulsions                            |
|                                                             | d) Language delay                         |
|                                                             | e) Delayed learning                       |
|                                                             | f) Anaemia                                |
|                                                             | g) Other:                                 |

| EATING HABITS                                          |                          |
|--------------------------------------------------------|--------------------------|
| 1. Height (m)                                          |                          |
| 2. Weight (Kg)                                         |                          |
| 3. How many glasses of water do you drink in a day?    | a) None                  |
|                                                        | b) 1 or 2 glasses        |
|                                                        | c) 3 or 4 glasses        |
|                                                        | d) 5 or 6 glasses        |
|                                                        | e) 7 or 8 glasses        |
|                                                        | f) 9 or more glasses     |
| 4. How many times a day do you usually drink soda?     | a) None                  |
|                                                        | b) Less than once a day  |
|                                                        | c) 1 time per day        |
|                                                        | d) 2 times a day         |
|                                                        | e) 3 times a day         |
|                                                        | f) 4 times a day         |
|                                                        | g) 5 or more times a day |
| 6. How many times a day do you usually eat fruit?      | a) None in the last week |
|                                                        | b) Less than once a day  |
|                                                        | c) 1 time per day        |
|                                                        | d) 2 times a day         |
|                                                        | e) 3 times a day         |
|                                                        | f) 4 times a day         |
|                                                        | g) 5 or more times a day |
| 7. How many times a day do you usually eat vegetables? | a) None in the last week |
|                                                        | b) Less than once a day  |
|                                                        | c) 1 time per day        |
|                                                        | d) 2 times a day         |
|                                                        | e) 3 times a day         |
|                                                        | f) 4 times a day         |
|                                                        | g) 5 or more times a day |
| 8. How often do you eat breakfast?                     | a) Never                 |
|                                                        | b) Rarely                |
|                                                        | c) Sometimes             |
|                                                        | d) Most days             |

|                                                         |              |
|---------------------------------------------------------|--------------|
|                                                         | e) Always    |
| 9. During the last week, did you bring lunch to school? | a) Never     |
|                                                         | b) Rarely    |
|                                                         | c) Sometimes |
|                                                         | d) Most days |
|                                                         | e) Always    |

| HYGIENE HABITS                                                      |                                                      |
|---------------------------------------------------------------------|------------------------------------------------------|
| 1. How many times a day do you usually brush your teeth?            | a) None                                              |
|                                                                     | b) 1 time a day                                      |
|                                                                     | c) 2 times a day                                     |
|                                                                     | d) 3 times a day                                     |
|                                                                     | e) 4 or more times a day                             |
| 2. The last time you went to the dentist, what was the main reason? | a) I have never been to the dentist                  |
|                                                                     | b) Something was wrong with my teeth or gums         |
|                                                                     | c) To follow up on a treatment from a previous visit |
|                                                                     | d) For a check-up                                    |
| 3. Do you usually touch dogs or cats in the street?                 | a) Never                                             |
|                                                                     | b) Rarely                                            |
|                                                                     | c) Sometimes                                         |
|                                                                     | d) Almost always                                     |
|                                                                     | e) Always                                            |
| 4. Do you wash your hands after touching animals?                   | a) Never                                             |
|                                                                     | b) Rarely                                            |
|                                                                     | c) Sometimes                                         |
|                                                                     | d) Almost always                                     |
|                                                                     | e) Always                                            |
| 5. How often do you wash your hands after going to the toilet?      | a) Never                                             |
|                                                                     | b) Rarely                                            |
|                                                                     | c) Sometimes                                         |
|                                                                     | d) Almost always                                     |
|                                                                     | e) Always                                            |
| 6. How often do you use soap when you                               | a) Never                                             |

|                                                                |                                                  |
|----------------------------------------------------------------|--------------------------------------------------|
| wash your hands?                                               | b) Rarely                                        |
|                                                                | c) Sometimes                                     |
|                                                                | d) Almost always                                 |
|                                                                | e) Always                                        |
| 7. How do you usually wash your hands before eating at school? | a) I do not usually wash my hands                |
|                                                                | b) In a container with water used by others      |
|                                                                | c) In a container with water used only by myself |
|                                                                | d) Under the tap water                           |
|                                                                | e) Otherwise:                                    |
| 8. How do you usually wash your hands before eating at home?   | a) I do not usually wash my hands                |
|                                                                | b) In a container with water used by others      |
|                                                                | c) In a container with water used only by myself |
|                                                                | d) Under the tap water                           |
|                                                                | e) Otherwise:                                    |
| 9. How many times do you usually bathe per week?               | a) None                                          |
|                                                                | b) 1 time                                        |
|                                                                | c) 2 times                                       |
|                                                                | d) 3 times                                       |
|                                                                | e) 4 times                                       |
|                                                                | f) 5 times                                       |
|                                                                | g) 6 times                                       |
|                                                                | h) 7 times or more                               |
| 10. How do you normally drink the water at home?               | a) Bottled water                                 |
|                                                                | b) Tap water                                     |
|                                                                | c) Boiled water                                  |
|                                                                | d) I don't drink water                           |
